# Supplementary material for: Hydrogel-Assisted 3D Volumetric Hotspot for Sensitive Detection by Surface-Enhanced Raman Spectroscopy
Source: MDPI journal article supplement (doi:10.3390/ijms23021004), 2022-01-17
Supplement: s1 [file s1]

## Supplementary Material

# Hydrogel-assisted 3D volumetric hotspot for sensitive detection by surface-enhanced Raman spectroscopy

Soo Hyun Lee <sup>1</sup>, Sunho Kim <sup>2</sup>, Jun-Yeong Yang <sup>1</sup>, ChaeWon Mun <sup>1</sup>, Seunghun Lee <sup>1</sup>, Shin-Hyun Kim <sup>2,\*</sup> and Sung-Gyu Park <sup>1,\*</sup>

<sup>1</sup> Department of Nano-Bio Convergence, Korea Institute of Materials Science, 797 Changwondae-ro, Changwon 51508, Korea; sh\_lee@kims.re.kr (S.H.L.); yjy8184@kims.re.kr (J.-Y.Y.); apple1025@kims.re.kr (C.M.); seunghun@kims.re.kr (S.L.)

<sup>2</sup> Department of Chemical and Biomolecular Engineering, Korea Advanced Institute of Science and Technology (KAIST), Daejeon 34141, Korea; shkim1020@kaist.ac.kr (S.K.)

\* Correspondence: kim.sh@kaist.ac.kr (S.-H.K.) and sgpark@kims.re.kr (S.-G.P.)

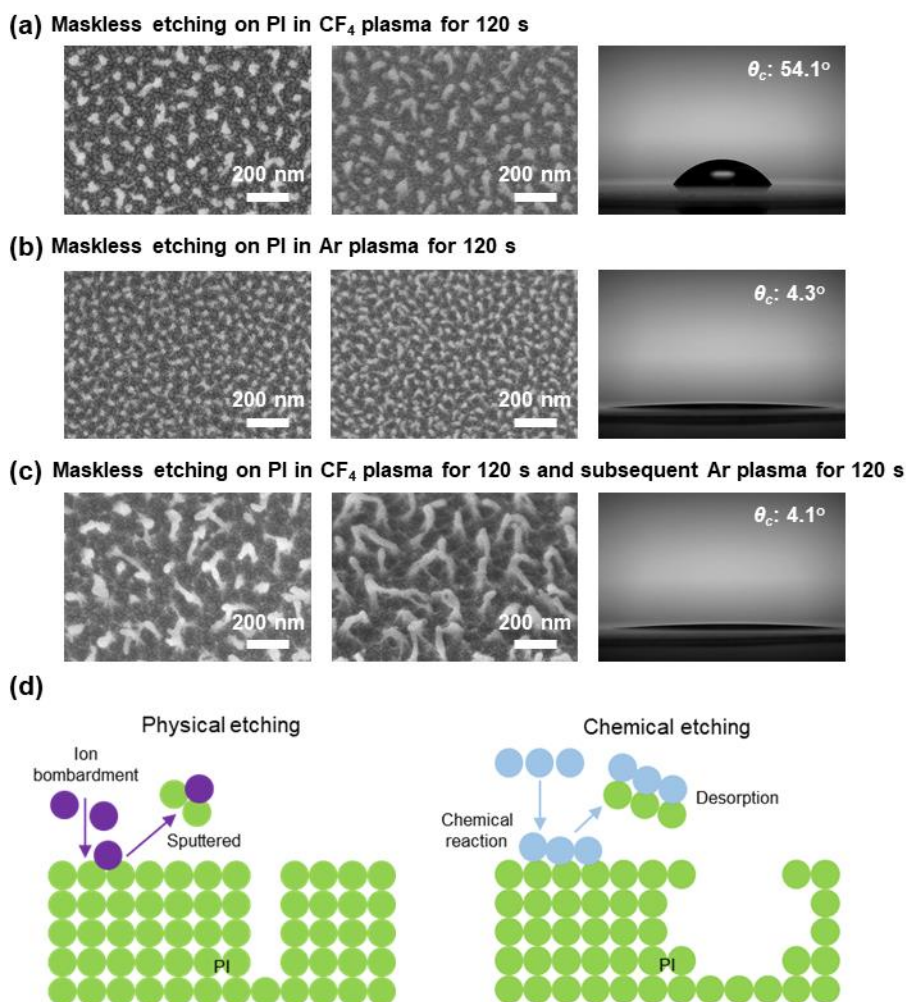

**Figure S1.** FE-SEM images and contact angle of PNs etched in (a) CF<sub>4</sub> plasma for 120 s, (b) Ar plasma for 120 s, and (c) CF<sub>4</sub> plasma for 120 s, followed by Ar plasma for 120 s. (d) Schematic showing the fundamentals of plasma etching.
